# Supplementary material for: One-pot synthesis of highly active and hydrothermally stable Pd@mHSiO2yolk–shell-structured nanoparticles for high-temperature reactions in hydrothermal environments
Source: Royal Society of Chemistry journal article supplement (doi:10.1039/c9dt04293h), 2019-12-06
Supplement: c9dt04293h1.pdf [file c9dt04293h1.pdf]

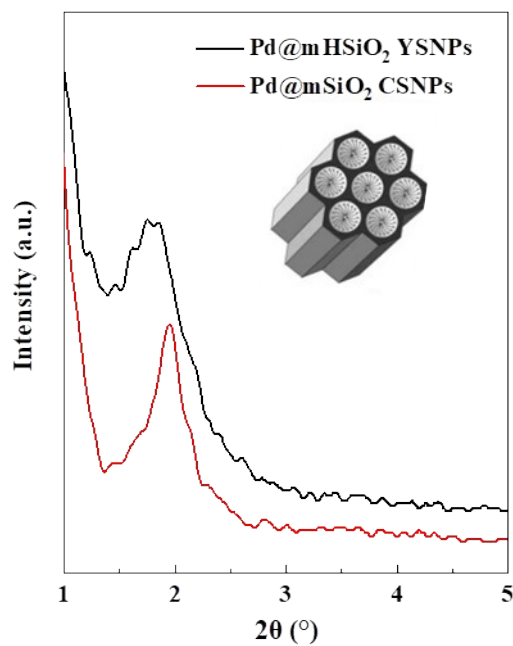

**Fig. S1.** small-angle XRD patterns of the Pd@mSiO<sub>2</sub> CSNPs and Pd@mHSiO<sub>2</sub> YSNPs.

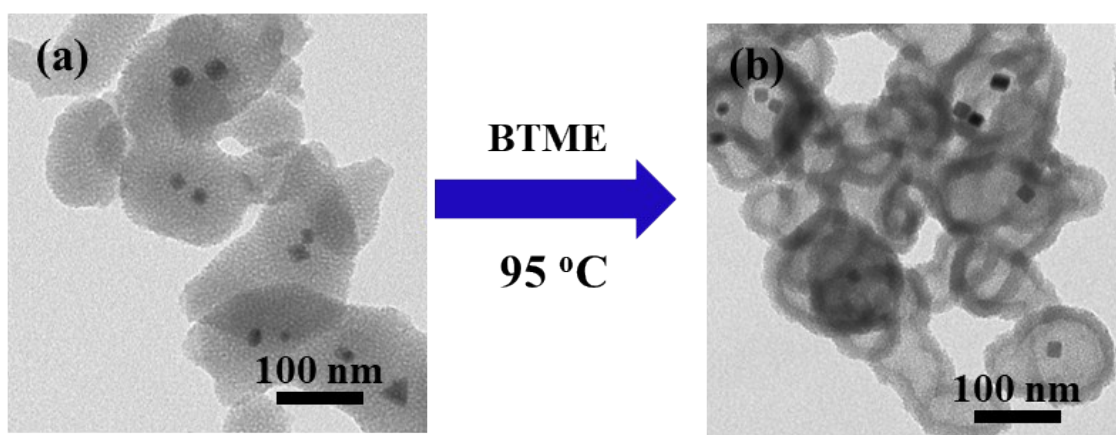

**Fig. S2.** The sample prepared by increasing the TEOS volume to 0.48 mL: (a) Pd@mSiO<sub>2</sub> CSNPs and (b) Pd@mHSiO<sub>2</sub> YSNPs.

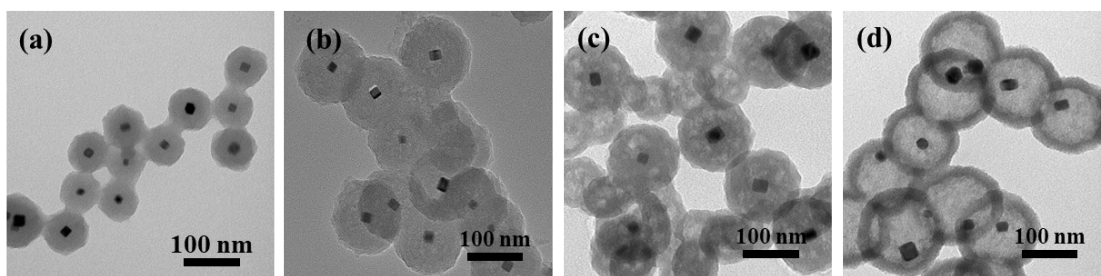

**Fig. S3.** TEM image of different samples: (a) Pd@SiO<sub>2</sub> CSNPs, (b) Pd@HSiO<sub>2</sub> YSNPs prepared by add BTME at 30 °C, (c) Pd@HSiO<sub>2</sub> YSNPs prepared by add BTME at 60 °C, Pd@HSiO<sub>2</sub> YSNPs prepared by add BTME at 95 °C.

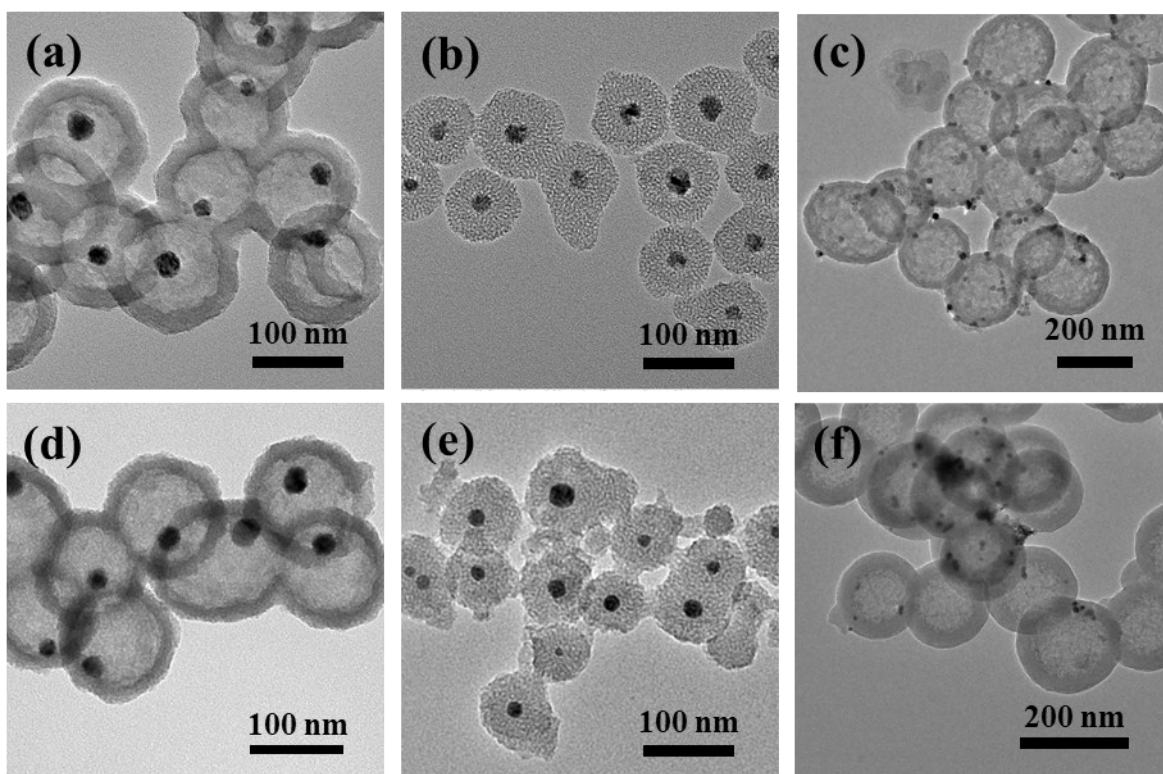

**Fig. S4.** TEM images of the catalyst after five cycles. (a, d) Pd@mHSiO<sub>2</sub> YSNPs, (b, e) Pd@mSiO<sub>2</sub>

CSNPs, (c, f) Pd/mSiO<sub>2</sub> NSs.

**Table.S1** mesoporous silica shell parameters and metal contents of the different core-shell catalysis synthesized.

| Sample                      | ICP-AES (wt%) |                   | N <sub>2</sub> -physisorption                         |                                                         |                           |
|-----------------------------|---------------|-------------------|-------------------------------------------------------|---------------------------------------------------------|---------------------------|
|                             | fresh         | After five cycles | S <sub>BET</sub><br>(m <sup>2</sup> g <sup>-1</sup> ) | V <sub>void</sub><br>(cm <sup>3</sup> g <sup>-1</sup> ) | D <sub>peak</sub><br>(nm) |
| Pd@mHSiO <sub>2</sub> YSNPs | 2.38          | 2.31              | 707.35                                                | 0.91                                                    | 2.0                       |
| Pd@mSiO <sub>2</sub> CSNPs  | 7.50          | 6.98              | 957.82                                                | 1.25                                                    | 2.2                       |
| Pd/mHSiO <sub>2</sub> NSs   | 3.35          | 1.05              | 623.36                                                | 1.21                                                    | 2.7                       |
